# Supplementary material
Source: PubMed Central journal article supplement (PMC6711767)
Supplement: EMS84160-supplement-Appendix_1.pdf [file EMS84160-supplement-Appendix_1.pdf]

## Appendix 1

| <b>Study</b>                                                                                                                                                                                                                   | <b>Data sources</b>                                                              | <b>Countries included</b> | <b>Measure of socioeconomic inequality</b>                                                                                                                              | <b>Years analysed</b>                   | <b>Measure of variation/ages included in analysis</b>  |
|--------------------------------------------------------------------------------------------------------------------------------------------------------------------------------------------------------------------------------|----------------------------------------------------------------------------------|---------------------------|-------------------------------------------------------------------------------------------------------------------------------------------------------------------------|-----------------------------------------|--------------------------------------------------------|
| Shkolnikov, V., E.M. Andreev, and A.Z. Begun. (2003). "Gini coefficient as a life table function: computation from discrete data, decomposition of differences and empirical examples." <i>Demographic Research</i> 8:305-358. | Russian educational data from Census and Berkley mortality database (males only) | Russia                    | Education (lower, secondary, university)                                                                                                                                | 1979-1989 (educational data year range) | Gini-coefficient / 20-64                               |
| Edwards, R.D. and S. Tuljapurkar. (2005). "Inequality in life spans and a new perspective on mortality convergence across industrialized countries." <i>Population and Development Review</i> 31(4):645-674.                   | US National Longitudinal Mortality Study (NLMS)                                  | United States             | Separate analysis for; education (less than high school, high school graduate) and income (first quintile of household income, all other quintiles of household income) | 1981 (income and education)             | Standard deviation conditional upon survival to age 10 |

## Appendix 1

| <b>Study</b>                                                                                                                                                                              | <b>Data sources</b>                                                                                                    | <b>Countries included</b>                                                                                  | <b>Measure of socioeconomic inequality</b>                                  | <b>Years analysed</b>                            | <b>Measure of variation/ages included in analysis</b>                             |
|-------------------------------------------------------------------------------------------------------------------------------------------------------------------------------------------|------------------------------------------------------------------------------------------------------------------------|------------------------------------------------------------------------------------------------------------|-----------------------------------------------------------------------------|--------------------------------------------------|-----------------------------------------------------------------------------------|
| van Raalte et al. (2011).<br>"More variation in lifespan in lower educated groups: evidence from 10 European countries."<br><i>International Journal of Epidemiology</i> 40(6):1703-1714. | Census based mortality data (linked longitudinal data for some countries and unlinked cross-sectional data for others) | Belgium, Czech Republic, Estonia, Finland, France, Norway, Poland, Slovenia, Sweden, Switzerland           | Educational level (low, medium, high)                                       | Data aggregated for 5-10 years beginning in 1990 | Standard deviation conditional upon survival to age 35                            |
| Brown et al (2012).<br>"The significance of education for mortality compression in the United States."<br><i>Demography</i> 49(3):819-840.                                                | Health and Retirement study and the National Health Interview Survey Linked Mortality File                             | United States                                                                                              | Years of completed formal schooling (0-11years, 12 years, ≥13 years)        | Data aggregated for 1989-1996                    | Compression measured by standard deviation above modal age of death. Ages 50-100+ |
| van Raalte et al. (2012).<br>"The contribution of educational inequalities to lifespan variation."<br><i>Popul Health Metr</i> 10(1):3-3                                                  | Census based mortality data                                                                                            | Sweden, Norway, Finland, Belgium, Switzerland, France, Slovenia, Czech Republic, Poland Estonia, Lithuania | Educational level (elementary, lower secondary, higher secondary, tertiary) | Data aggregated for Census in 1990 to 2000       | Theil Index conditional upon survival to age 35                                   |

## Appendix 1

| <b>Study</b>                                                                                                                                                                         | <b>Data sources</b>                                                                            | <b>Countries included</b> | <b>Measure of socioeconomic inequality</b>                                    | <b>Years analysed</b>                                                                                            | <b>Measure of variation/ages included in analysis</b>                                                         |
|--------------------------------------------------------------------------------------------------------------------------------------------------------------------------------------|------------------------------------------------------------------------------------------------|---------------------------|-------------------------------------------------------------------------------|------------------------------------------------------------------------------------------------------------------|---------------------------------------------------------------------------------------------------------------|
| van Raalte et al. (2014). "Lifespan Variation by Occupational Class: Compression or Stagnation Over Time?" <i>Demography</i> 51(1):73-95.                                            | Individual level register based data linked to mortality data by personal identification codes | Finland                   | Occupation bases SES (upper non-manual, lower non-manual, Manual, other)      | 1971-2010 (eight subsets -1970, 1975, 1980, 1985, 1990, 1995, 2000, 200)                                         | Life disparity conditional upon survival to age 31 (sensitivity analysis conditional upon survival to age 40) |
| van Raalte et al. (2015). "The role of smoking on mortality compression: An analysis of Finnish occupational social classes, 1971-2010." <i>Demographic Research</i> 32(20):589-620. | Individual level register based data linked to mortality data by personal identification codes | Finland                   | Occupation bases SES (upper non-manual, lower non-manual, Manual, other)      | 1971-2010 (eight subsets 1971-1976, 1976-1980, 1981-1985, 1986-1990, 1991-1995, 1996-2000, 2001-2205, 2006-2010) | Life disparity conditional upon survival to age 50                                                            |
| Sasson, I. (2016). "Trends in Life Expectancy and Lifespan Variation by Educational Attainment: United States, 1990–2010." <i>Demography</i> :1-25.                                  | National Vital Statistics System                                                               | United States             | Years of educational attainment (0-11years, 12 years, 13-15 years, ≥16 years) | 1990, 2000, 2010                                                                                                 | Standard deviation conditional upon survival to age 25                                                        |

## Appendix 1

| <b>Study</b>                                                                                                                                                                        | <b>Data sources</b>                                                                            | <b>Countries included</b> | <b>Measure of socioeconomic inequality</b>                                                                                                     | <b>Years analysed</b> | <b>Measure of variation/ages included in analysis</b>                        |
|-------------------------------------------------------------------------------------------------------------------------------------------------------------------------------------|------------------------------------------------------------------------------------------------|---------------------------|------------------------------------------------------------------------------------------------------------------------------------------------|-----------------------|------------------------------------------------------------------------------|
| Brønnum-Hansen, H. (2017). "Socially disparate trends in lifespan variation: a trend study on income and mortality based on nationwide Danish register data." <i>BMJ Open</i> 7(5). | Individual level register based data linked to mortality data by personal identification codes | Denmark                   | Total household income after tax and other deductions that is available for spending and saving and divided by the number of equivalent adults | 1986-2014             | Life disparity conditional upon survival to age 30                           |
| Permanyer, I.S., J. Blanes, A. Renteria, E., <i>Longevity and lifespan variation by educational attainment in Spain: 1960-2015</i> . Demography (publication in progress).          | Spanish 'Encuesta Sociodemográfica' and mortality files from the Spanish Statistical Office    | Spain                     | Educational attainment groups                                                                                                                  | 1960-2015             | Inequality in age-at-death distributions conditional upon survival to age 35 |
