# Supplementary material
Source: PubMed Central journal article supplement (PMC6711767)
Supplement: EMS84160-supplement-Appendix_5.pdf [file EMS84160-supplement-Appendix_5.pdf]

## Appendix 5

| <b>ICD 9 and ICD 10 codes used for cause of death categories</b> |                                                                                                                                                                                    |                                                                                                     |                                                                                                                  |
|------------------------------------------------------------------|------------------------------------------------------------------------------------------------------------------------------------------------------------------------------------|-----------------------------------------------------------------------------------------------------|------------------------------------------------------------------------------------------------------------------|
| <b>Category</b>                                                  |                                                                                                                                                                                    | <b>ICD-9 (1981 and 1991)</b>                                                                        | <b>ICD-10 (2001 and 2011)</b>                                                                                    |
| <b>External</b>                                                  | Comprising chronic liver disease, accidents, intentional self-harm and events of undetermined intent, mental and behavioural disorders due to use of drugs or alcohol, and assault | 5710-5719,E800-E929, E950-E959,E980-E989, 3040-3049,3052-3059, 2910-2919,3030-3039, 3050, E960-E969 | K70-K709, K73-K749, V01-X599,Y85-Y869, X60-X849, Y870,Y872,Y10-Y349, F11-F169,F18-F199, F10-F109, X85-Y099, Y871 |
| <b>Cancers</b>                                                   | Comprising all malignant neoplasm                                                                                                                                                  | 140-208                                                                                             | C00-97                                                                                                           |
| <b>Circulatory</b>                                               | Comprising Ischaemic heart disease and cerebrovascular disease                                                                                                                     | 390-459                                                                                             | I00-99                                                                                                           |
| <b>Respiratory</b>                                               | Comprising chronic obstructive pulmonary disease and chronic lower respiratory diseases                                                                                            | 460-519                                                                                             | J00-99                                                                                                           |
| *all remaining ICD codes attributed to 'other causes' category   |                                                                                                                                                                                    |                                                                                                     |                                                                                                                  |
