# Supplementary material
Source: PubMed Central journal article supplement (PMC6711767)
Supplement: EMS84160-supplement-Appendix_8.pdf [file EMS84160-supplement-Appendix_8.pdf]

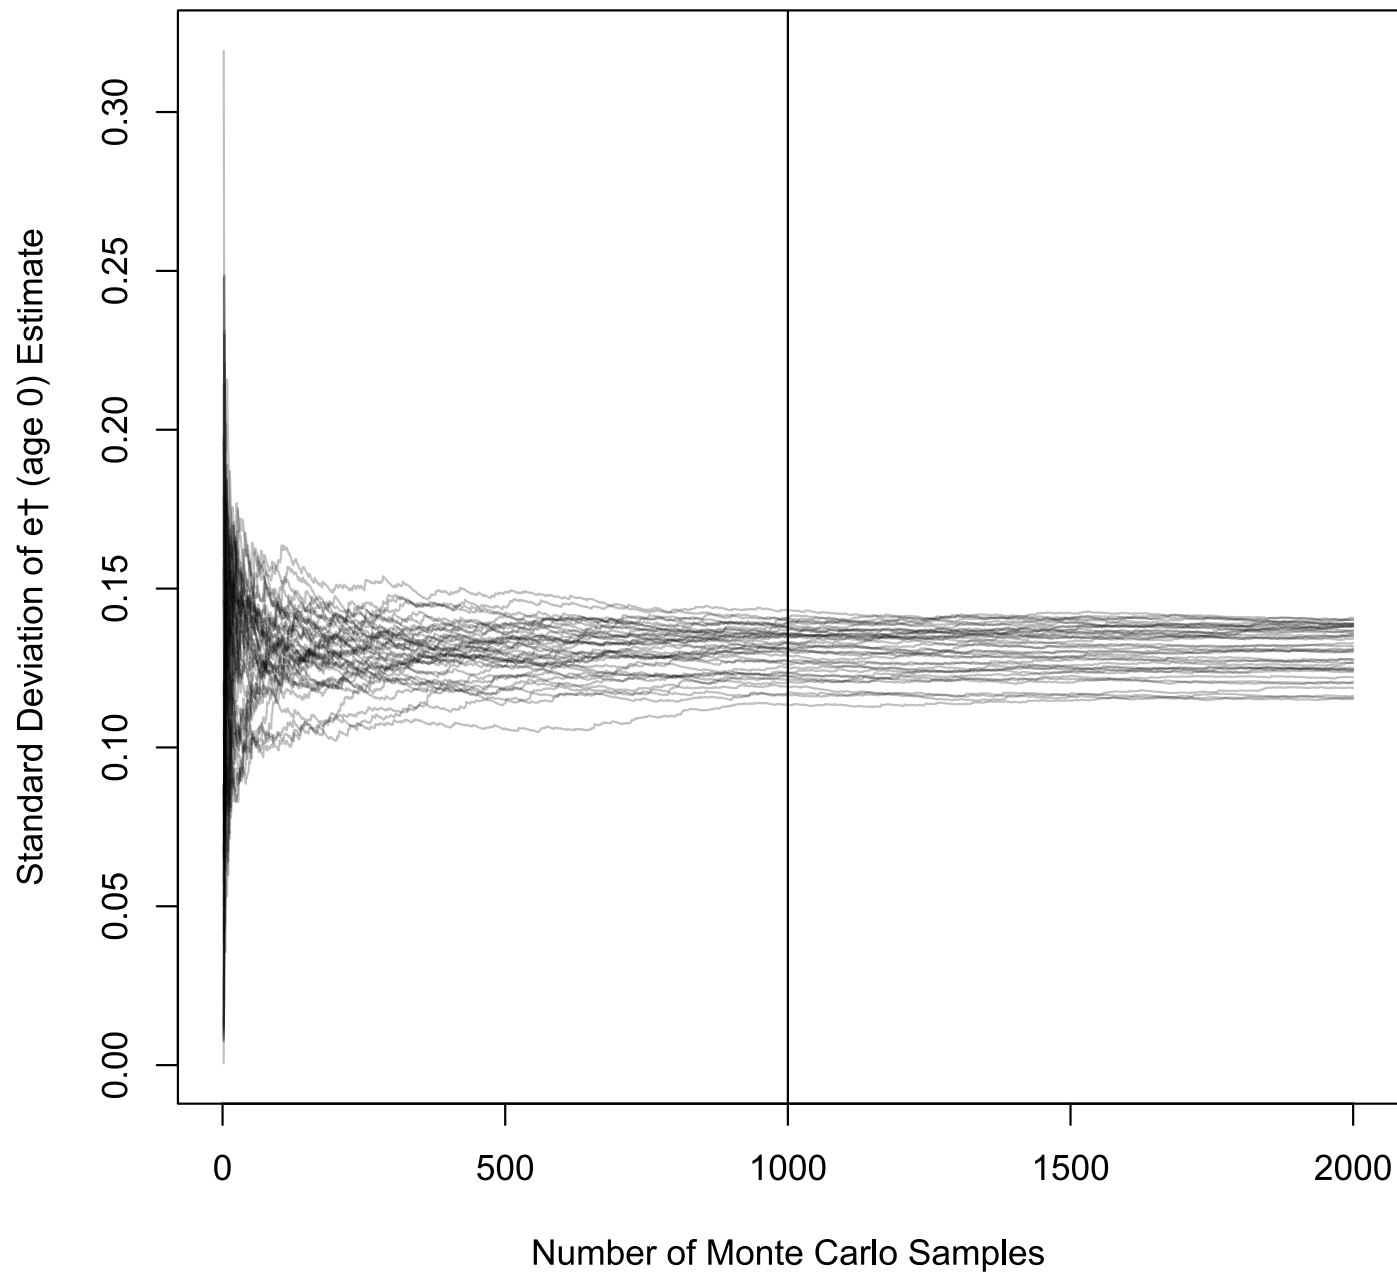

We formally tested the stability of our estimates from 1000 repetitions by extending the number of repetitions to 2000. We did this formal test for the lifespan variation estimates at age 0 by year, sex and deprivation quintile only. The standard deviation of the Monte Carlo sample flat lined before 1000 repetitions and the additional accuracy gained after 1000 repetitions was minimal.
