# Supplementary material
Source: PubMed Central journal article supplement (PMC6711767)

Lifespan Variation (Years)

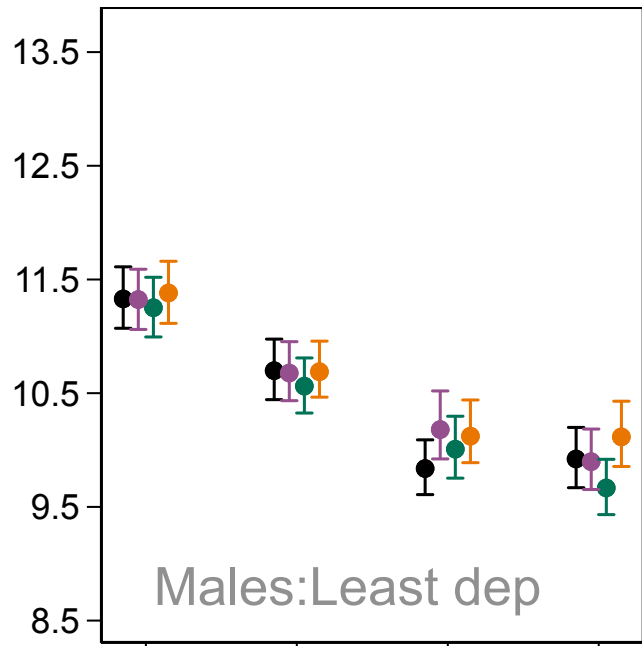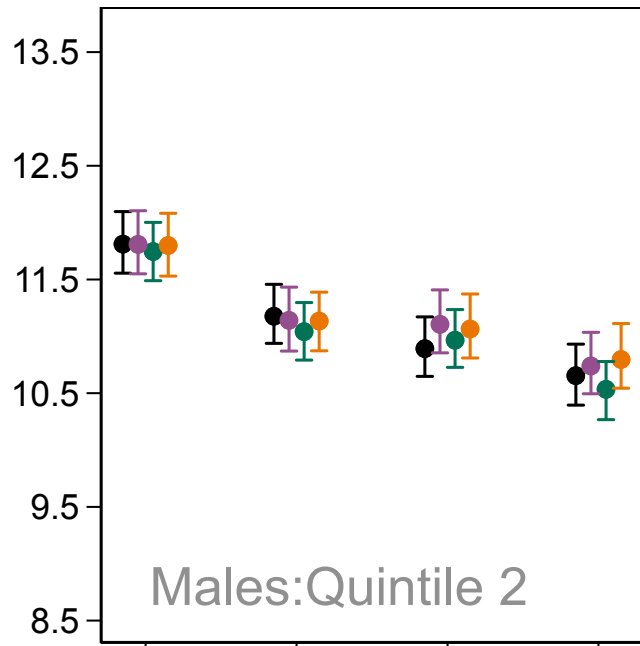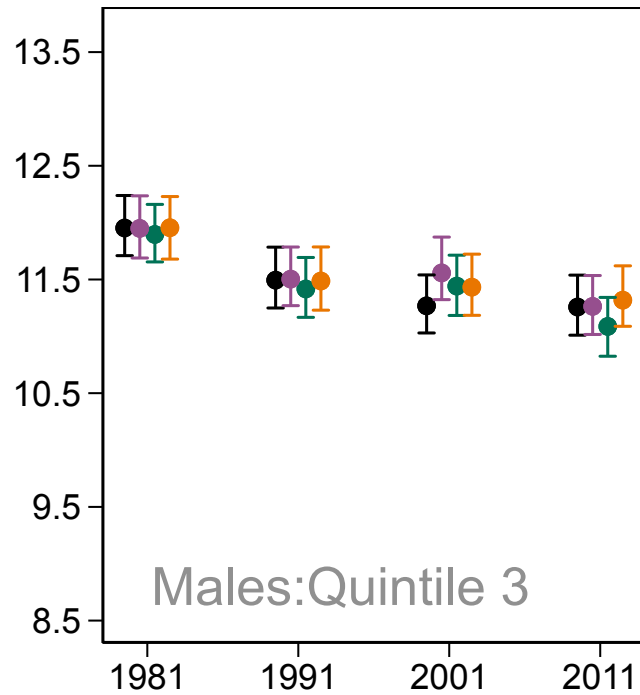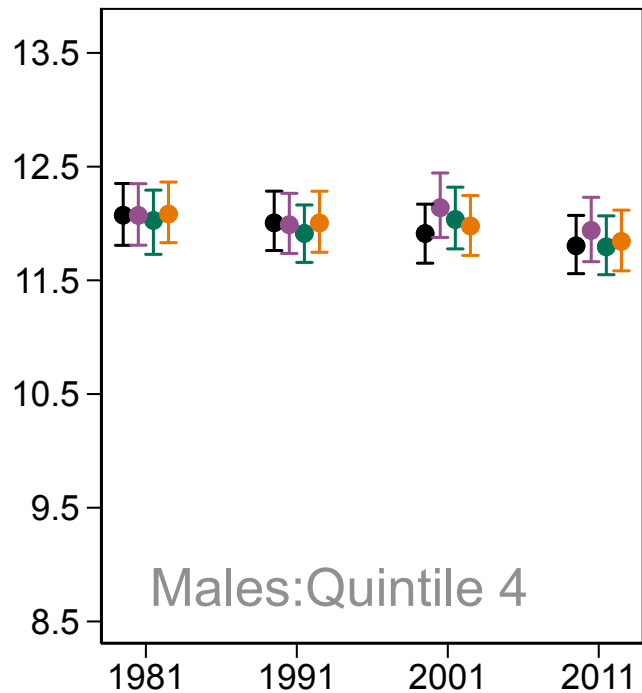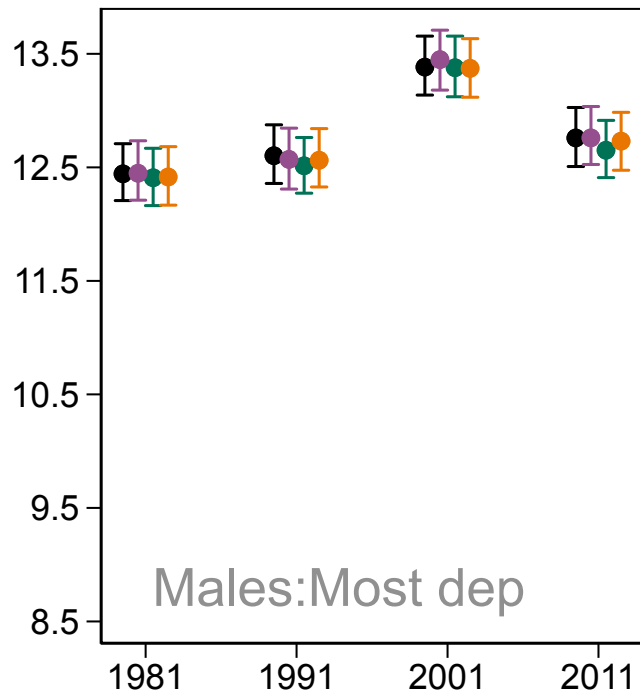

Main Results  
Kannisto  
Gompertz  
Quadratic

Year

Supplement: EMS84160-supplement-Appendix_2.pdf [file EMS84160-supplement-Appendix_2.pdf]

Lifespan Variation (Years)

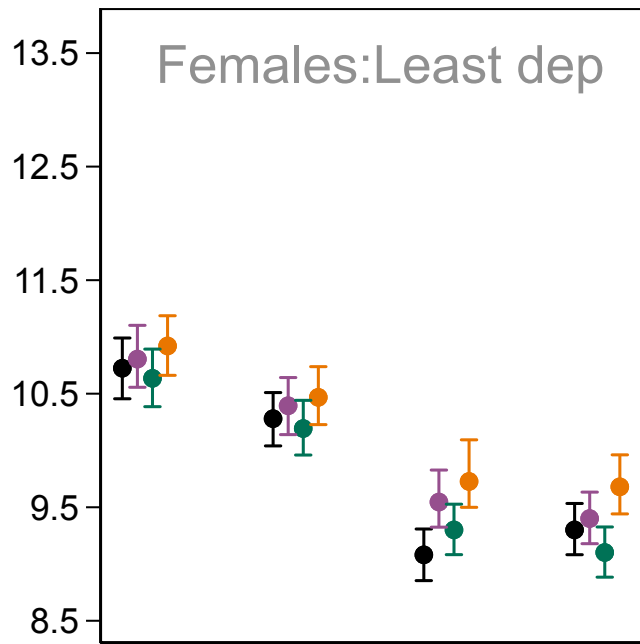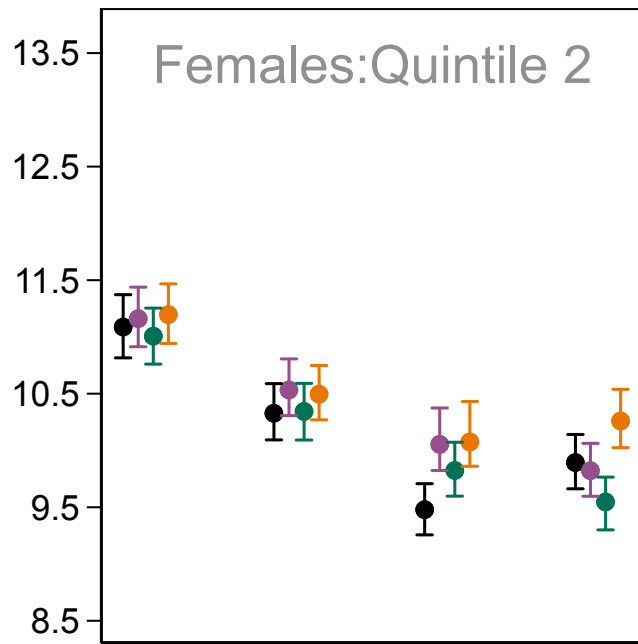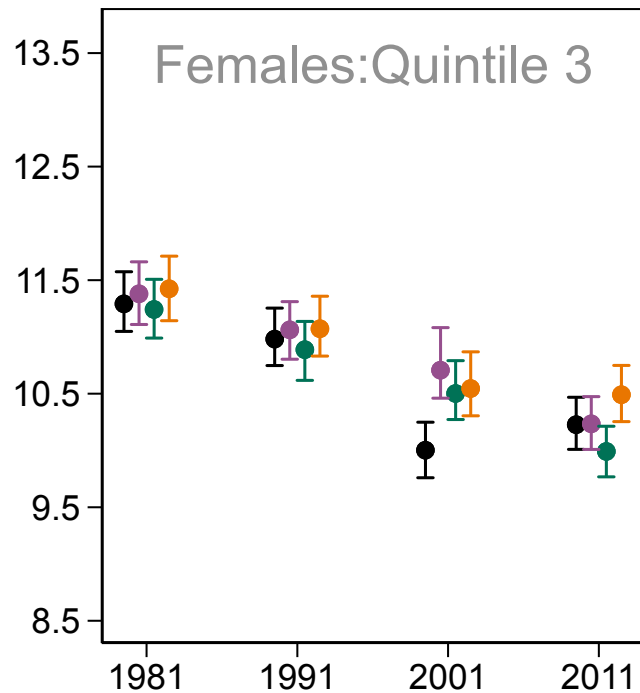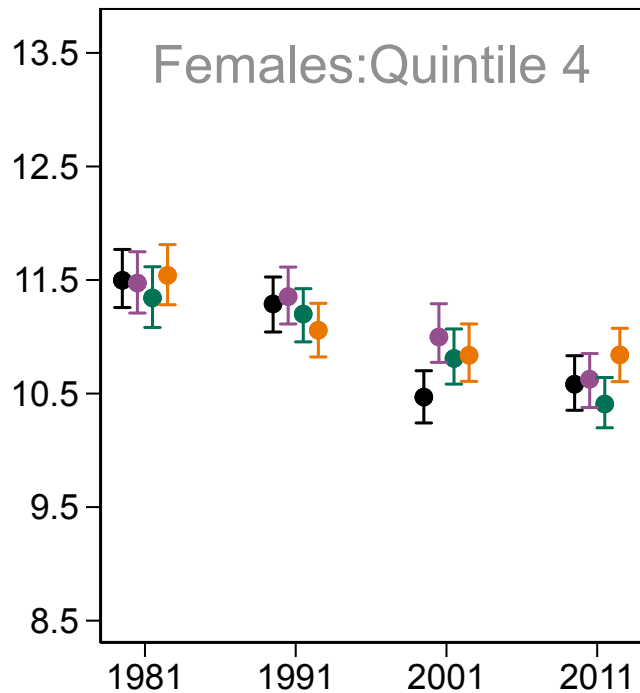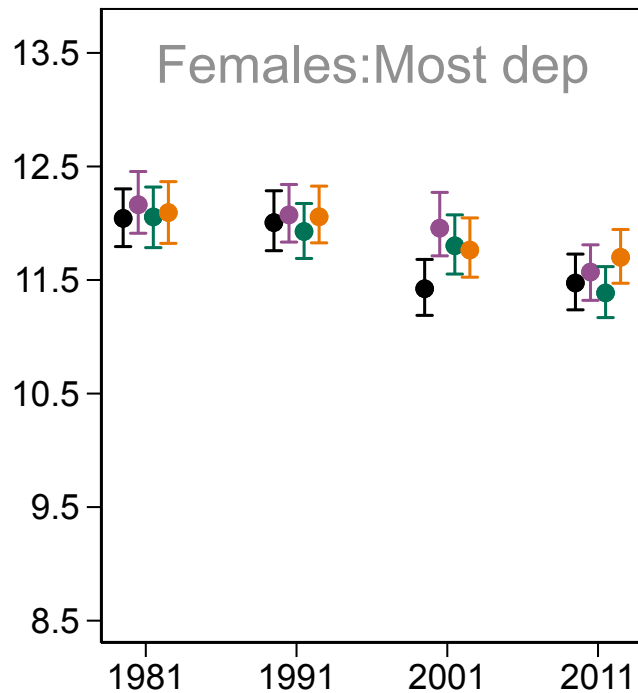

Year

Main Results  
Kannisto  
Gompertz  
Quadratic

Supplement: EMS84160-supplement-Appendix_3.pdf [file EMS84160-supplement-Appendix_3.pdf]

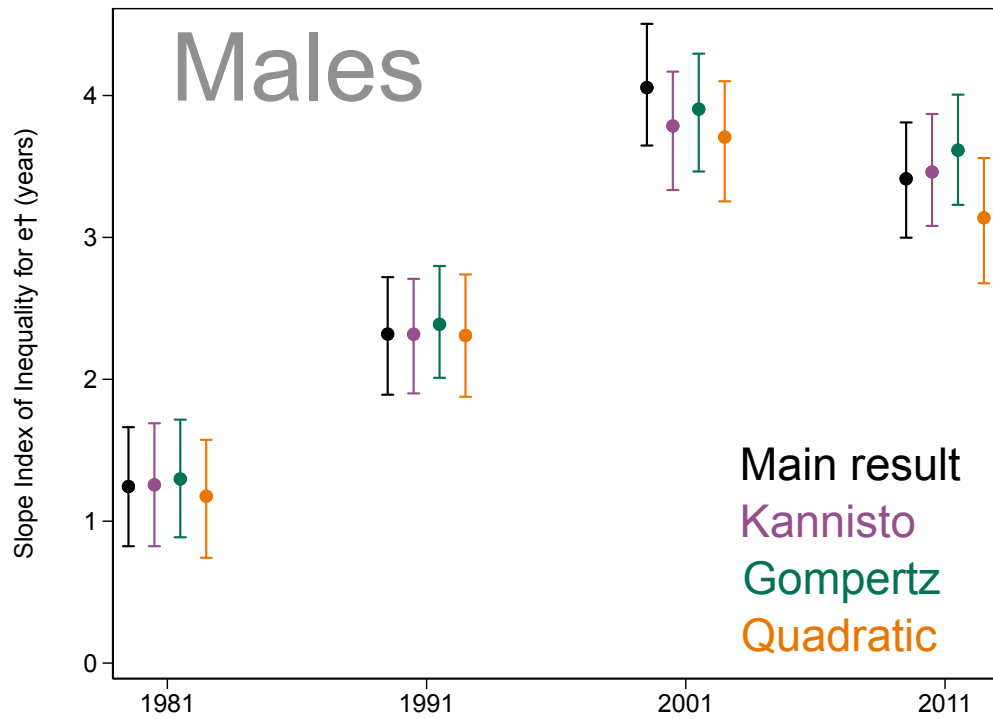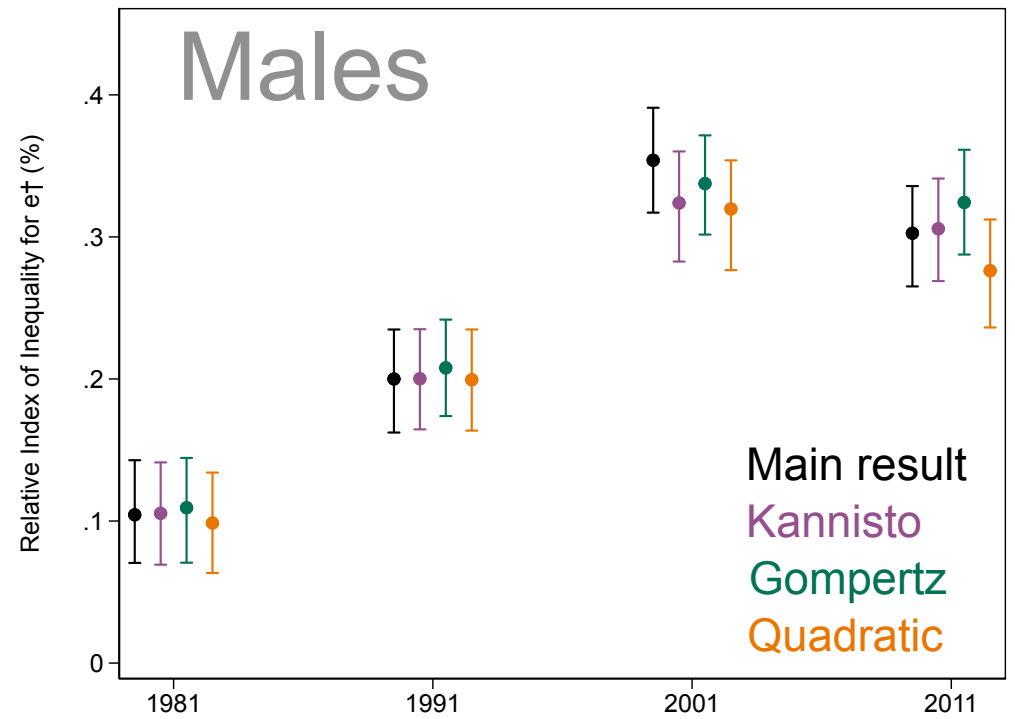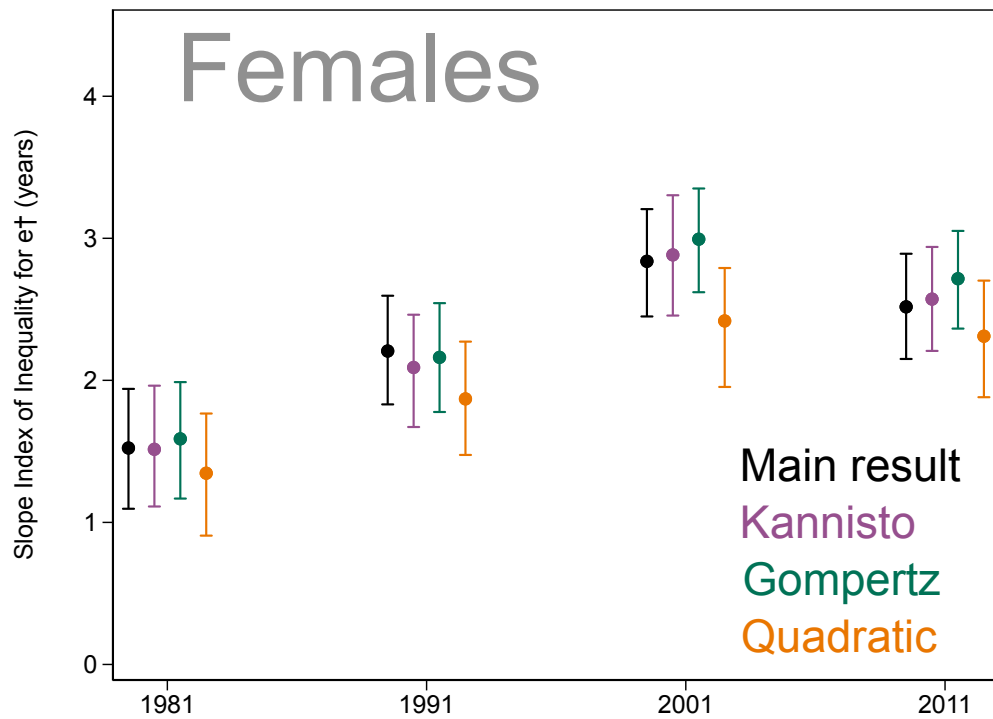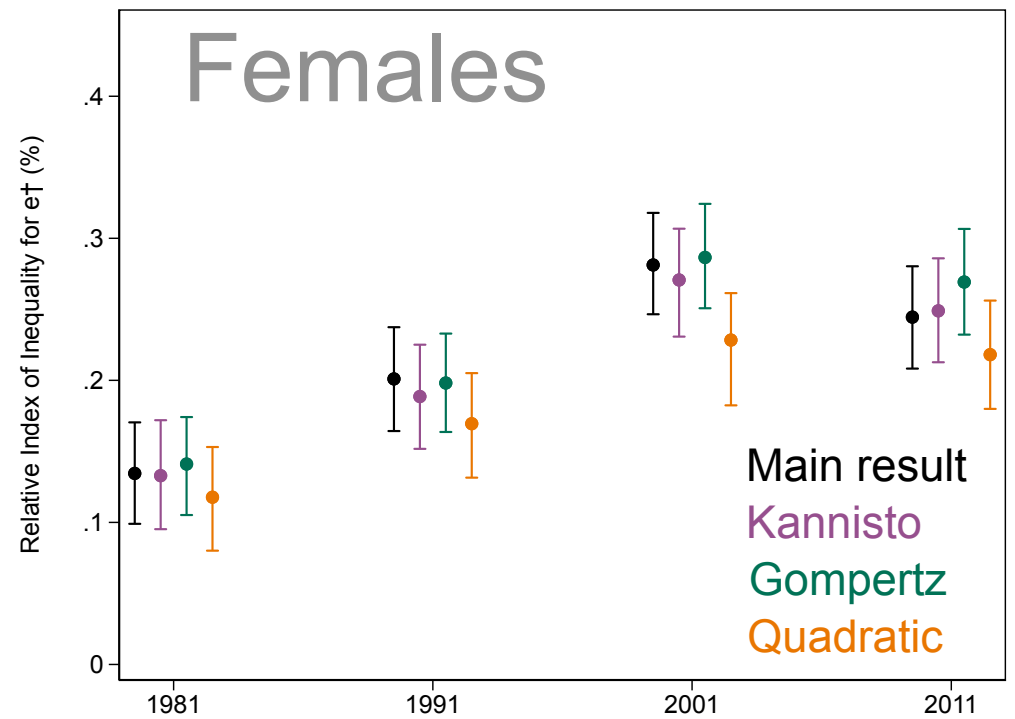

Supplement: EMS84160-supplement-Appendix_4.pdf [file EMS84160-supplement-Appendix_4.pdf]

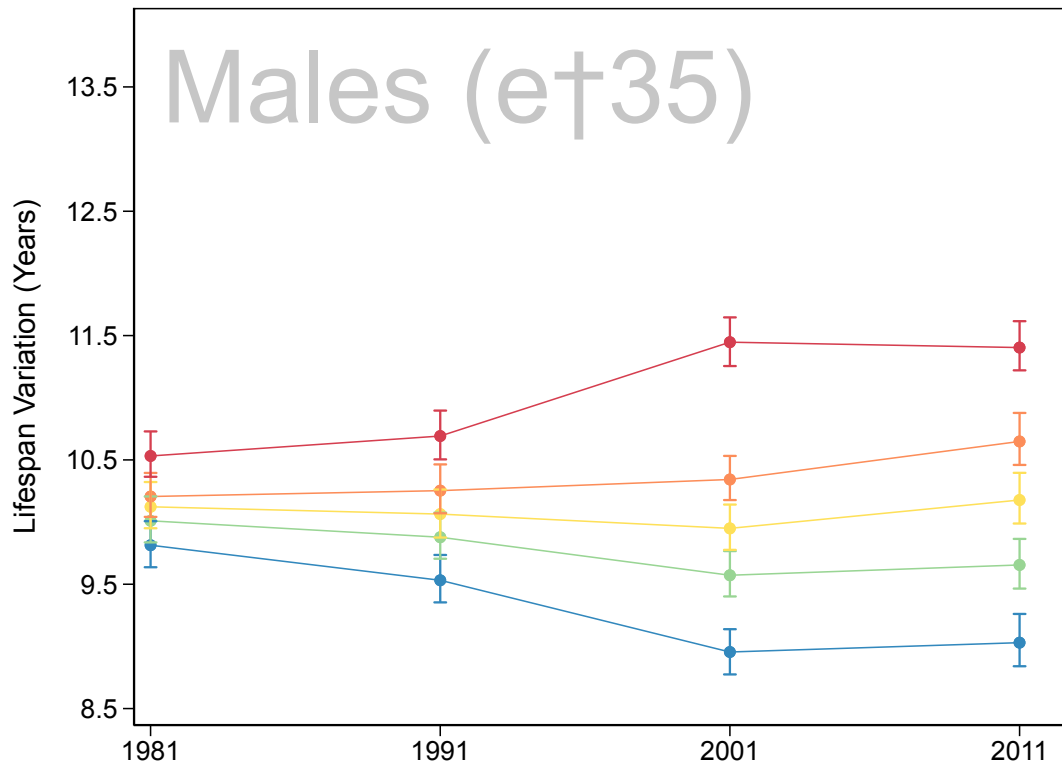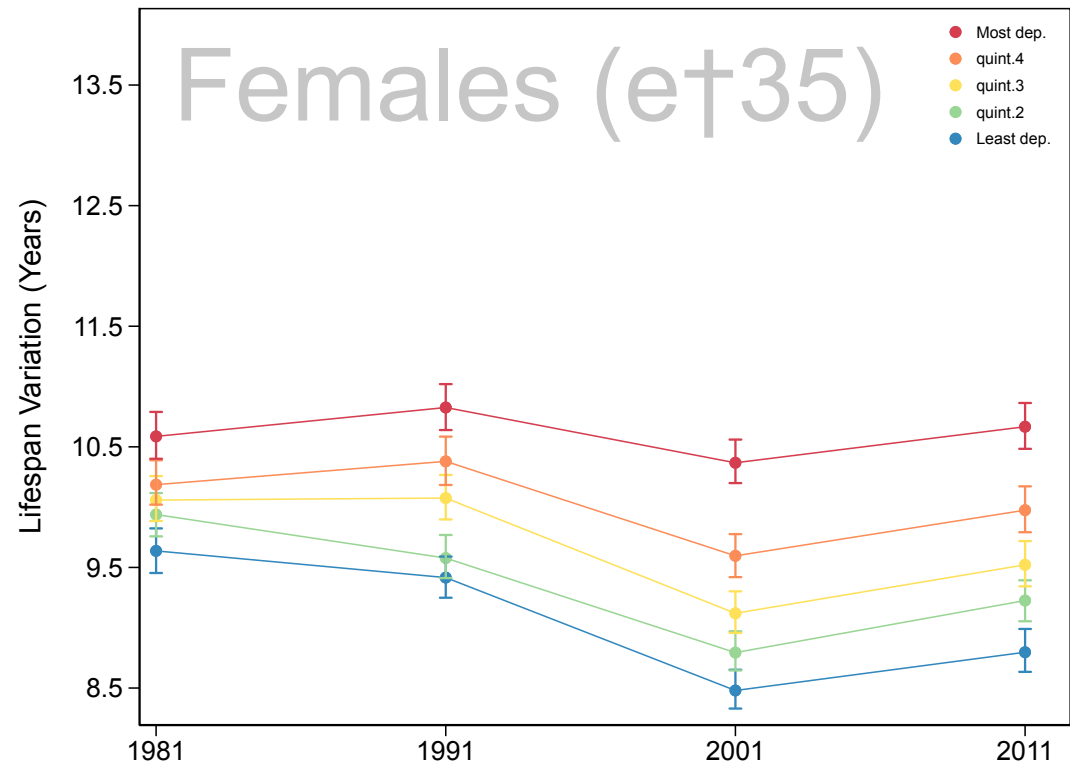

Supplement: EMS84160-supplement-Appendix_6.pdf [file EMS84160-supplement-Appendix_6.pdf]

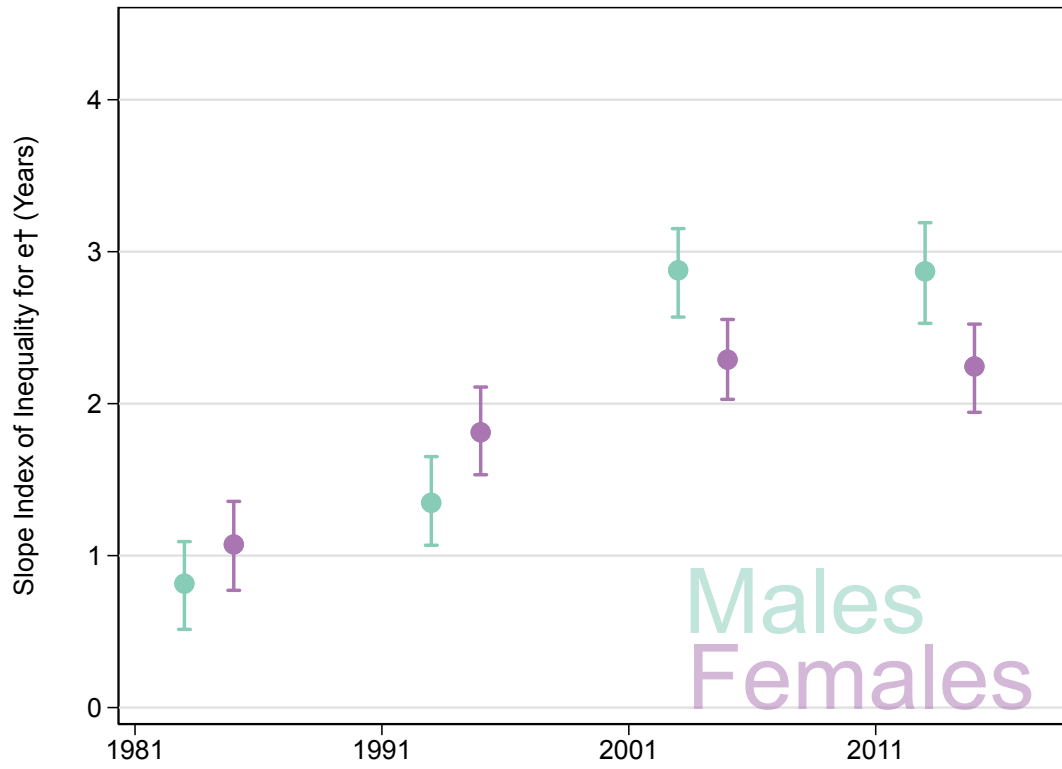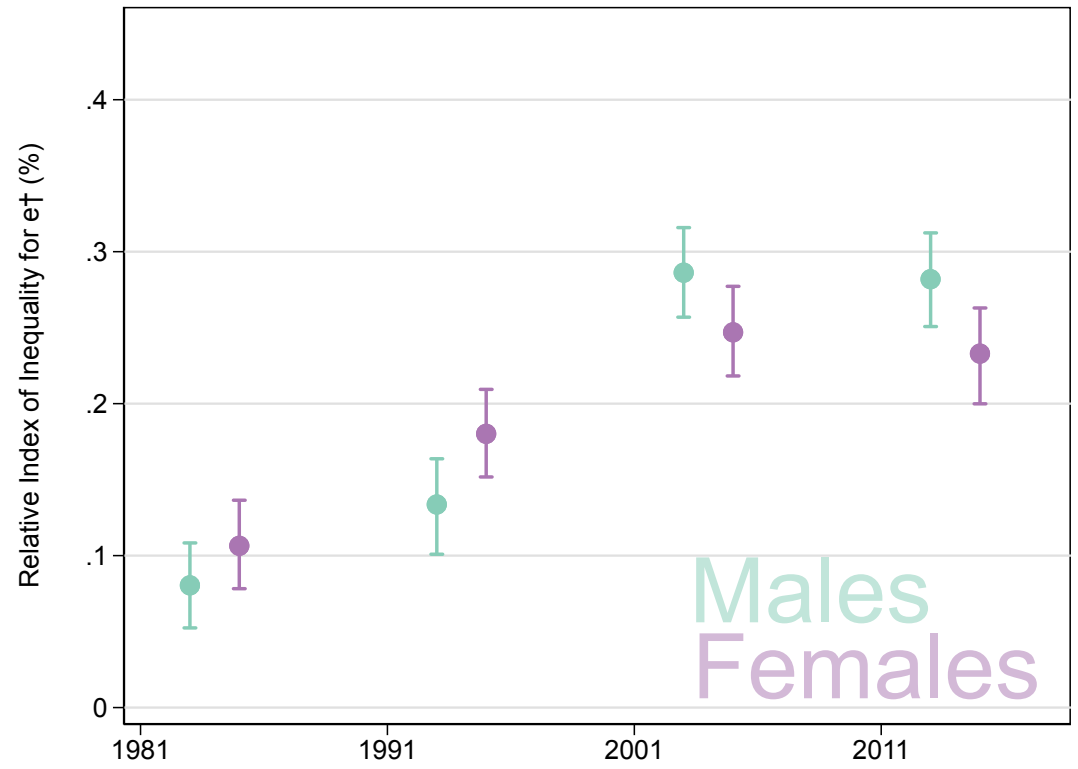

Supplement: EMS84160-supplement-Appendix_7.pdf [file EMS84160-supplement-Appendix_7.pdf]

**Males**

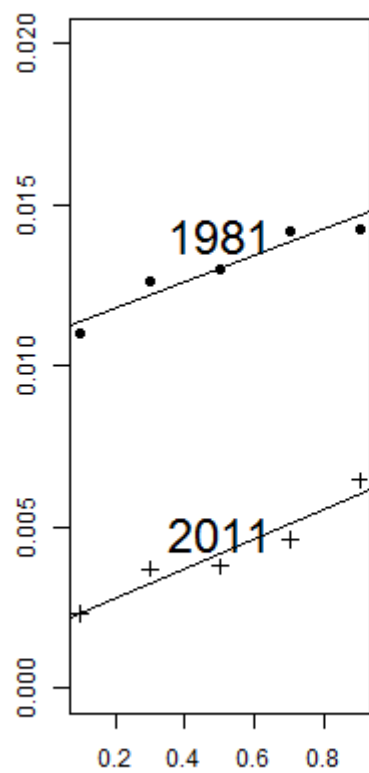

**Femles**

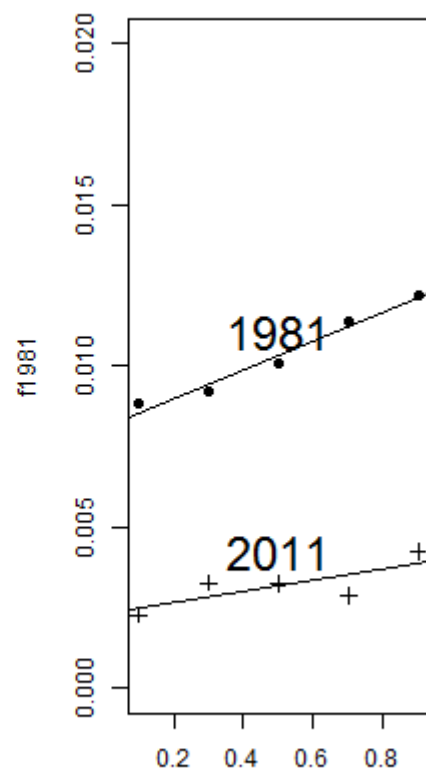

Supplement: EMS84160-supplement-Appendix_9.pdf [file EMS84160-supplement-Appendix_9.pdf]
